# Supplementary material for: Whole exome sequencing identifies mTOR and KEAP1 as potential targets for radiosensitization of HNSCC cells refractory to EGFR and β1 integrin inhibition
Source: PubMed Central journal article supplement (PMC5915060; doi:10.18632/oncotarget.24266), 2018-04-06
Supplement: oncotarget-09-18099-s001.pdf [file oncotarget-09-18099-s001.pdf]

## Whole exome sequencing identifies mTOR and KEAP1 as potential targets for radiosensitization of HNSCC cells refractory to EGFR and $\beta$ 1 integrin inhibition

### SUPPLEMENTARY MATERIALS

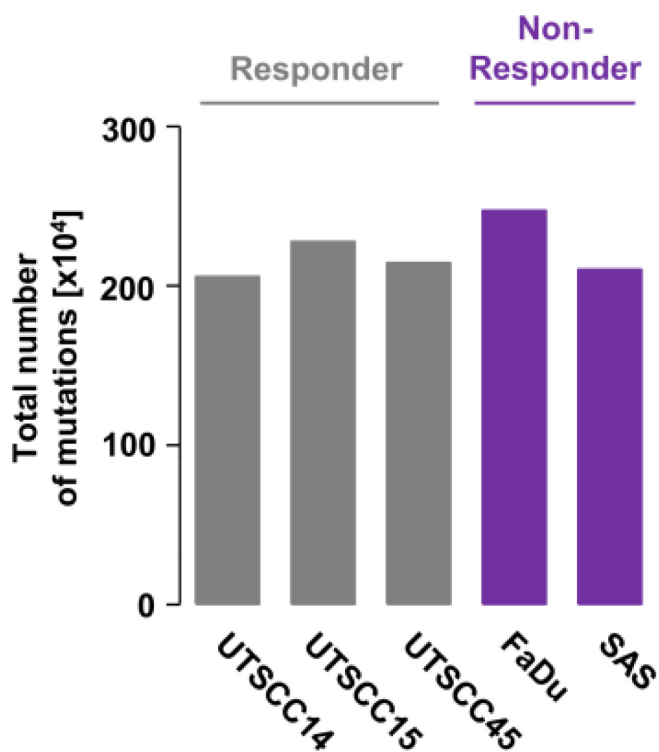

**Supplementary Figure 1: Mutations found in responder and non-responder cells.** Total number of non-coding and coding mutations detected in 3D grown responder (grey) and non-responder (purple) HNSCC cell lines.

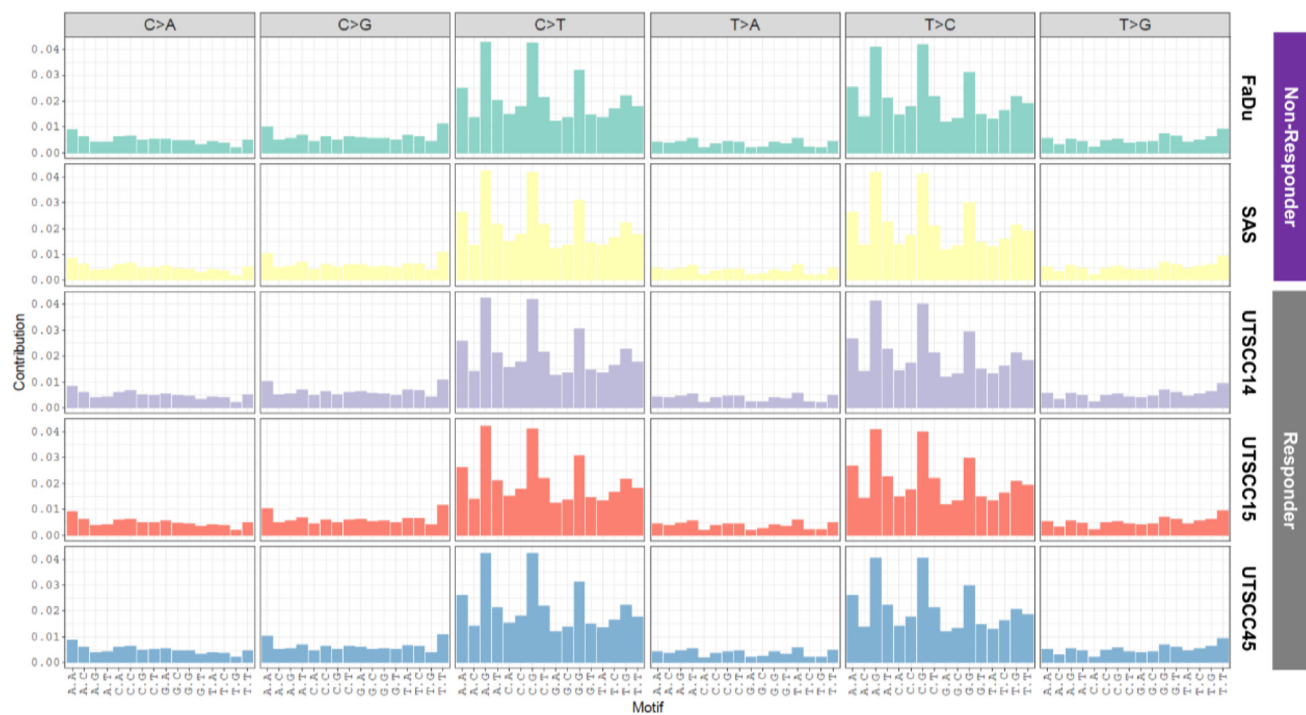

**Supplementary Figure 2: Mutational motifs of responder and non-responder cells.** Graphical representation of signatures identified in 3D IrECM-based UTSCC14, UTSCC15 and UTSCC45 (responders) as well as FaDu and SAS (non-responders) cell cultures. Mutations were identified by whole-exome sequencing.

**A**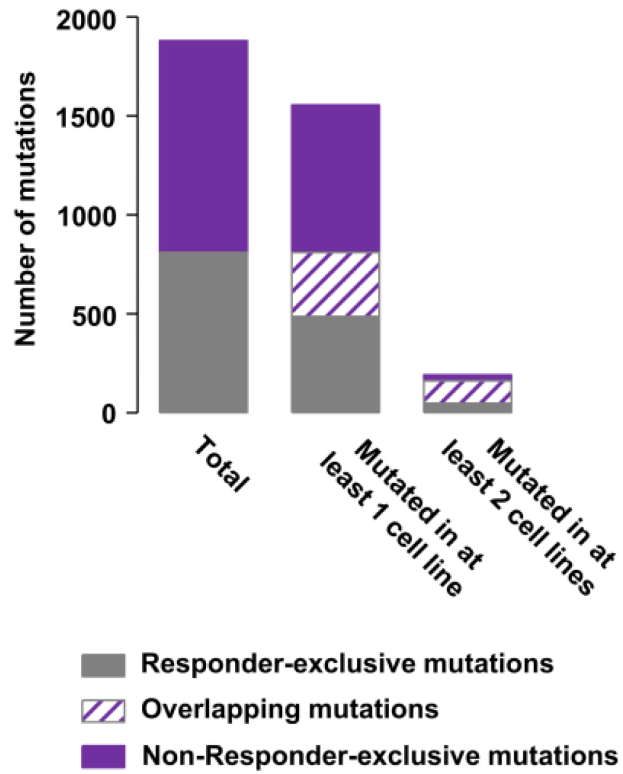**B**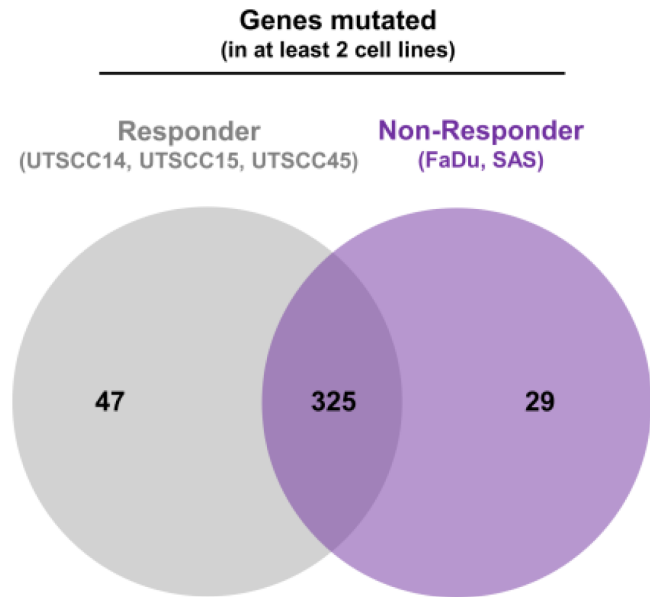

**Supplementary Figure 3: Mutational profiles of responder and non-responder cells.** (A) Number of coding mutations detected in 3D grown responder (grey) and non-responder (purple) HNSCC cell lines. (B) Venn diagram analysis of all mutated genes showing shared mutations and exclusively mutated genes in the responder or non-responder groups.

**A**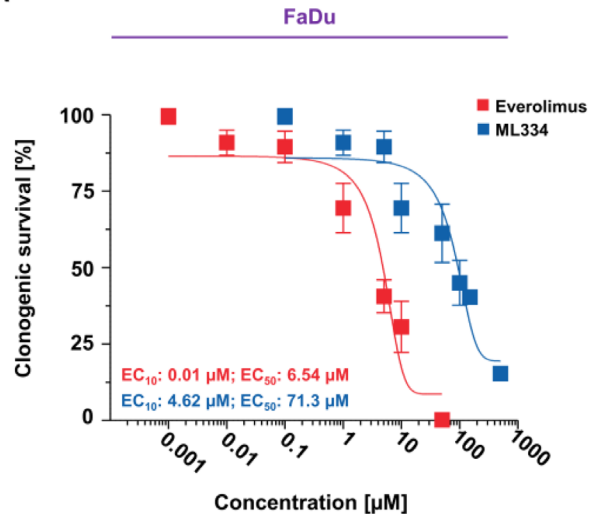**B**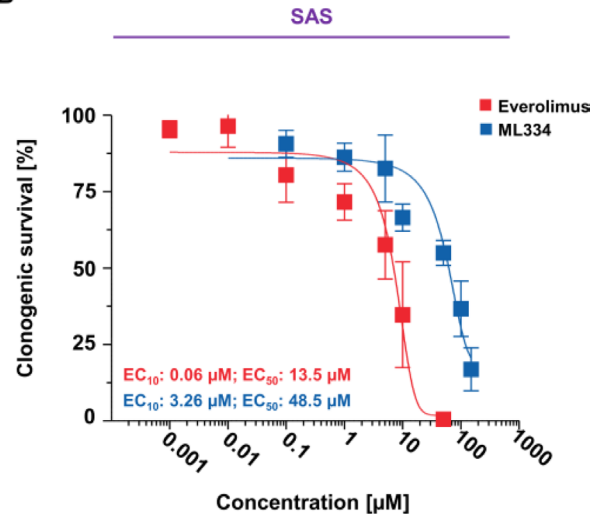

**Supplementary Figure 4: Cytotoxicity of Everolimus and ML334.** (A and B) Everolimus (mTORi) and ML334 (KEAP1i) cytotoxicity and corresponding EC<sub>10</sub> and EC<sub>50</sub> values in FaDu (A) and SAS (B) cells (colony formation assay). Results show mean  $\pm$  SEM ( $n = 3$ ).

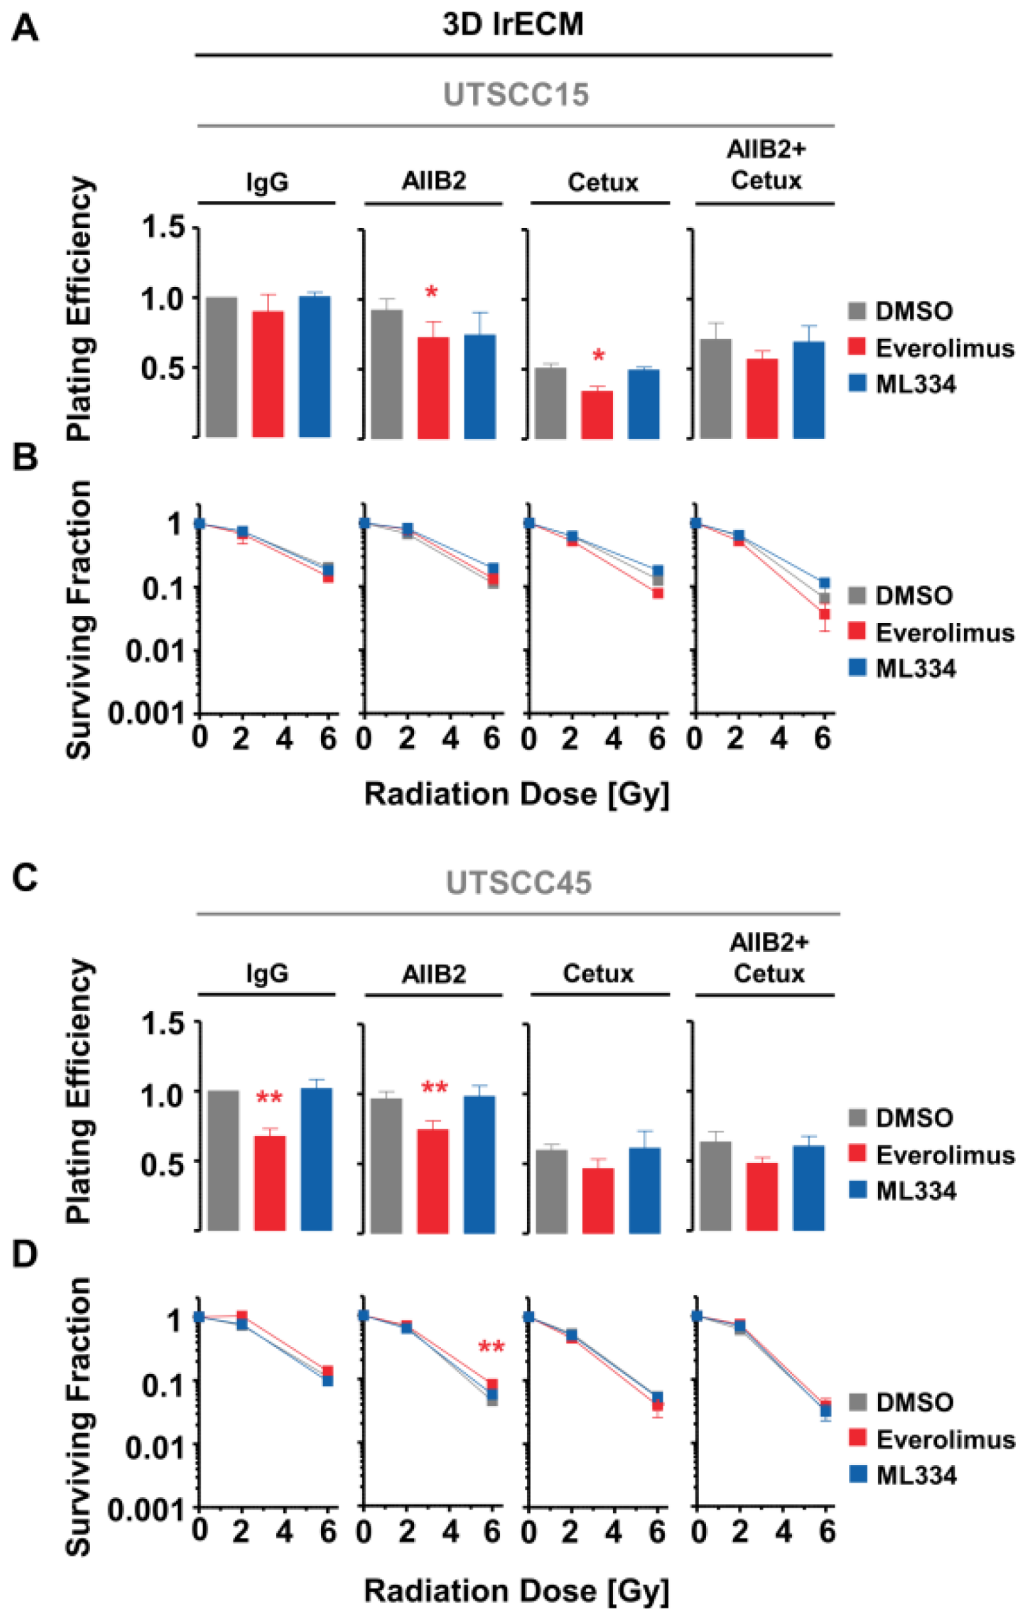

**Supplementary Figure 5: Pharmacological inhibition of KEAP1 and mTOR fails to further radiosensitize AIB2/Cetuximab treated UTSCC15 and UTSCC45 responder cells.** (A) Cytotoxicity measured as clonogenic survival and (B) clonogenic radiation survival of UTSCC15 cells upon treatment with 10 nM Everolimus (mTOR inhibitor) or 3.3  $\mu$ M ML334 (KEAP1i) simultaneously to AIB2, Cetuximab or AIB2/Cetuximab plus 2–6 Gy X-rays (DMSO, IgG and 0 Gy as control). (C) Cytotoxicity measured as clonogenic survival and (D) clonogenic radiation survival of UTSCC45 cells upon treatment with 10 nM Everolimus (mTOR inhibitor) or 3.3  $\mu$ M ML334 (KEAP1i) simultaneously to AIB2, Cetuximab or AIB2/Cetuximab plus 2–6 Gy X-rays (DMSO, IgG and 0 Gy as control).

**Supplementary Table 1: Number and type of mutations detected in HNSCC responder (UTSCC14, UTSCC15, UTSCC45) and non-responder (FaDu, SAS) cells using whole exome sequencing**

| Type               | UT14   | UT15   | UT45   | FaDu   | SAS    |
|--------------------|--------|--------|--------|--------|--------|
| A>C                | 5750   | 6429   | 5951   | 7007   | 5950   |
| A>G                | 21434  | 24778  | 22636  | 27695  | 21975  |
| A>T                | 4227   | 4744   | 4416   | 5108   | 4388   |
| C>A                | 5307   | 5882   | 5487   | 6696   | 5423   |
| C>G                | 6627   | 7395   | 7027   | 8445   | 6664   |
| C>T                | 21336  | 24569  | 22746  | 27563  | 22017  |
| G>A                | 21383  | 24398  | 22730  | 27672  | 21921  |
| G>C                | 6580   | 7385   | 6843   | 8376   | 6572   |
| G>T                | 5224   | 5984   | 5451   | 6777   | 5396   |
| T>A                | 4367   | 4841   | 4518   | 5184   | 4353   |
| T>C                | 21686  | 24972  | 22580  | 27760  | 22247  |
| T>G                | 5620   | 6448   | 5900   | 7037   | 5676   |
| <b>Insertion</b>   | 11147  | 13135  | 11830  | 14858  | 11758  |
| <b>Deletion</b>    | 13702  | 16251  | 14728  | 18766  | 14460  |
| <b>SNV</b>         | 129541 | 147825 | 136285 | 165320 | 132582 |
| <b>MNV</b>         | 3153   | 3514   | 3459   | 3685   | 3360   |
| <b>Replacement</b> | 527    | 592    | 551    | 680    | 574    |
| <b>Total</b>       | 158070 | 181317 | 166853 | 203309 | 162734 |

**Supplementary Table 2: ID, gene name and sequence of used esiRNAs.** See Supplementary\_Table\_2

**Supplementary Table 3: Results of the esiRNA screen in 3D grown FaDu cells for the indicated treatments.** *P*-values are referring to the corresponding RLUC controls. See Supplementary\_Table\_3

**Supplementary Table 4: Results of the esiRNA screen in 3D grown SAS cells for the indicated treatments.** *P*-values are referring to the corresponding RLUC controls. See Supplementary\_Table\_4

**Supplementary Table 5: Data of the ratio of phosphorylated protein to non-phosphorylated protein levels from phosphoproteome array of 3D cultured UTSCC14, UTSCC15, UTSCC45, SAS and FaDu cells.** See Supplementary\_Table\_5
